# Supplementary material
Source: Springer Nature journal article supplement (https://www.springermedizin.de/resource/supplementary/12916_2012_605_MOESM4_ESM.pdf/9597970)

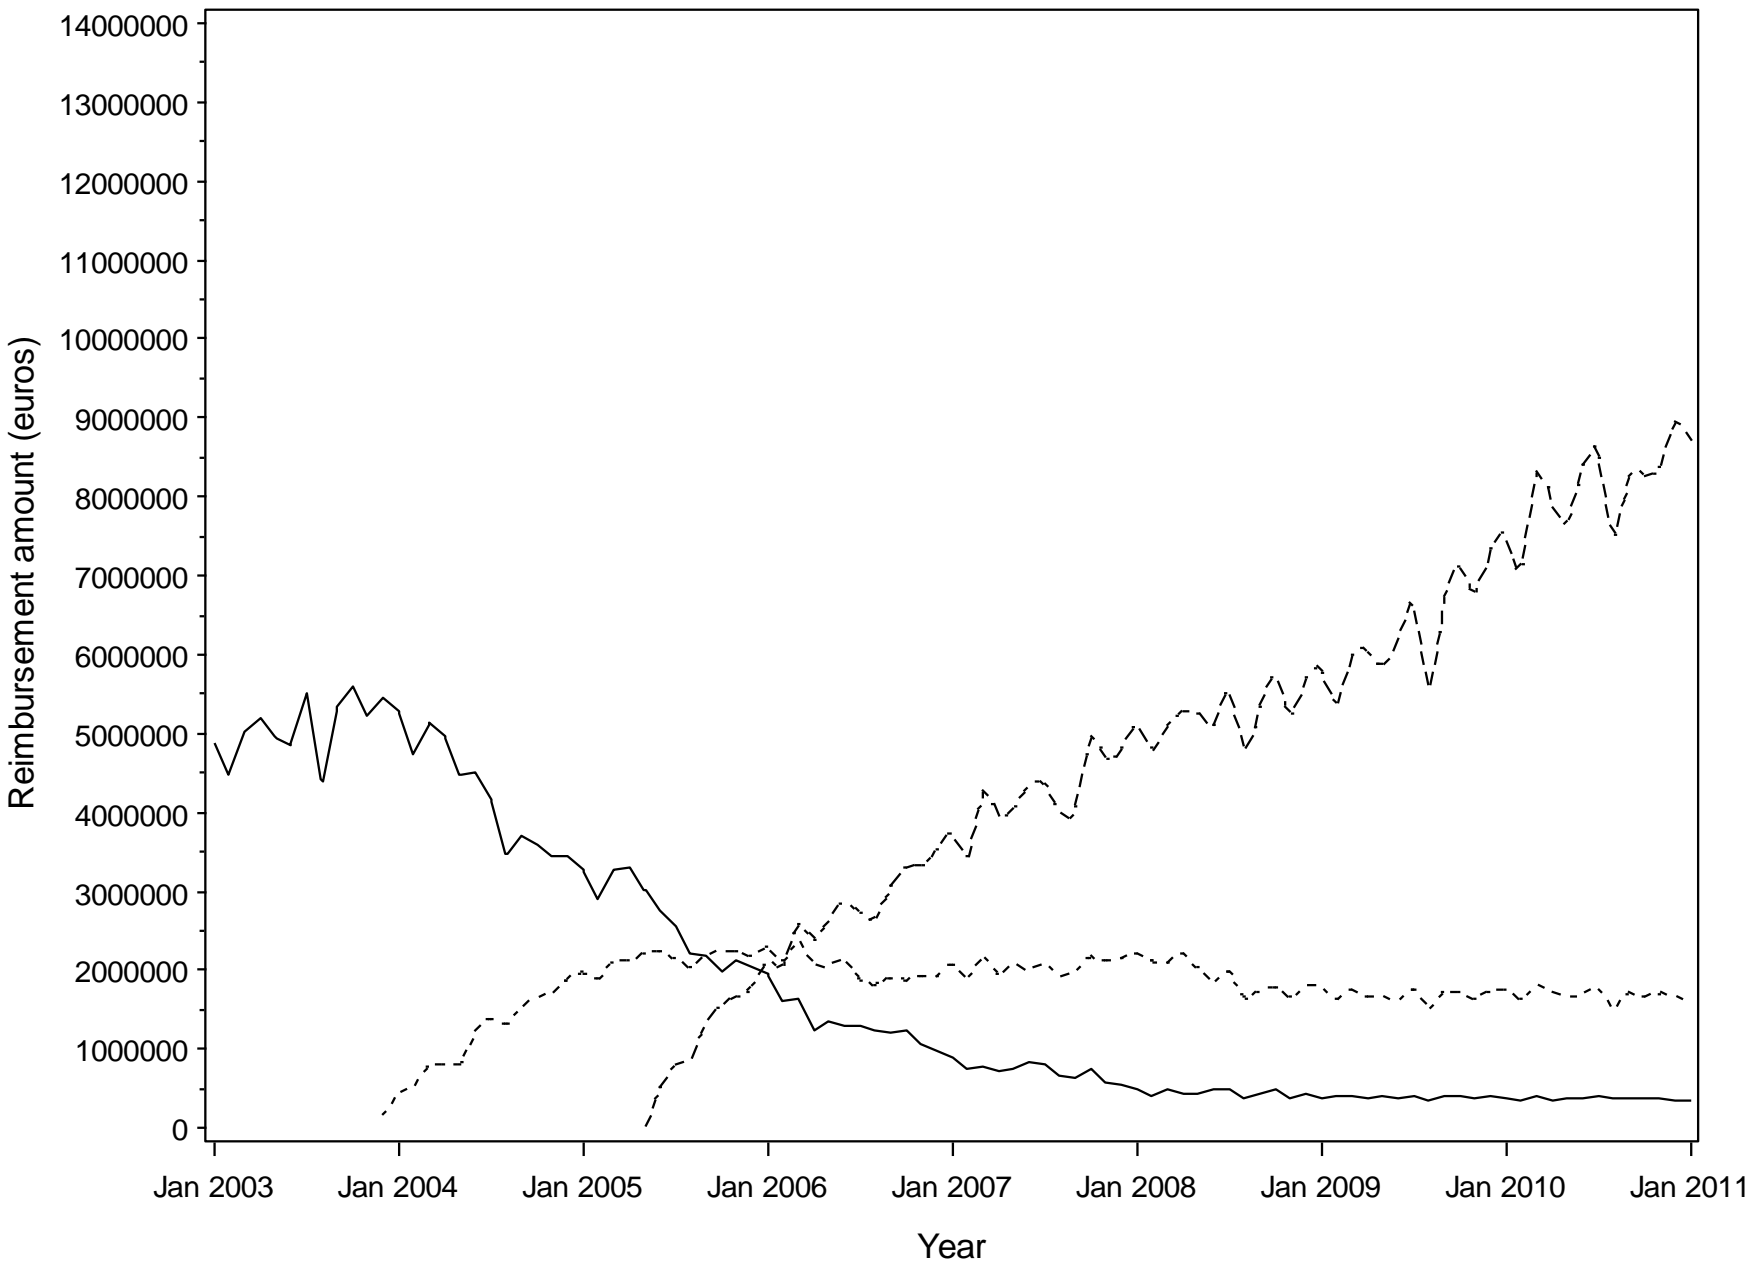

— CITALOPRAM      - - - - CITALOPRAM GENERIC DRUGS      - · - · - ESCITALOPRAM

Supplement: MOESM4 [file 9597970]
